# Supplementary material for: BAC and RNA sequencing reveal the brown planthopper resistance gene BPH15 in a recombination cold spot that mediates a unique defense mechanism
Source: PubMed Central journal article supplement (PMC4148935; doi:10.1186/1471-2164-15-674), 2014-08-11
Supplement: 12864_2014_6374_MOESM6_ESM.pdf [file 12864_2014_6374_MOESM6_ESM.pdf]

**A**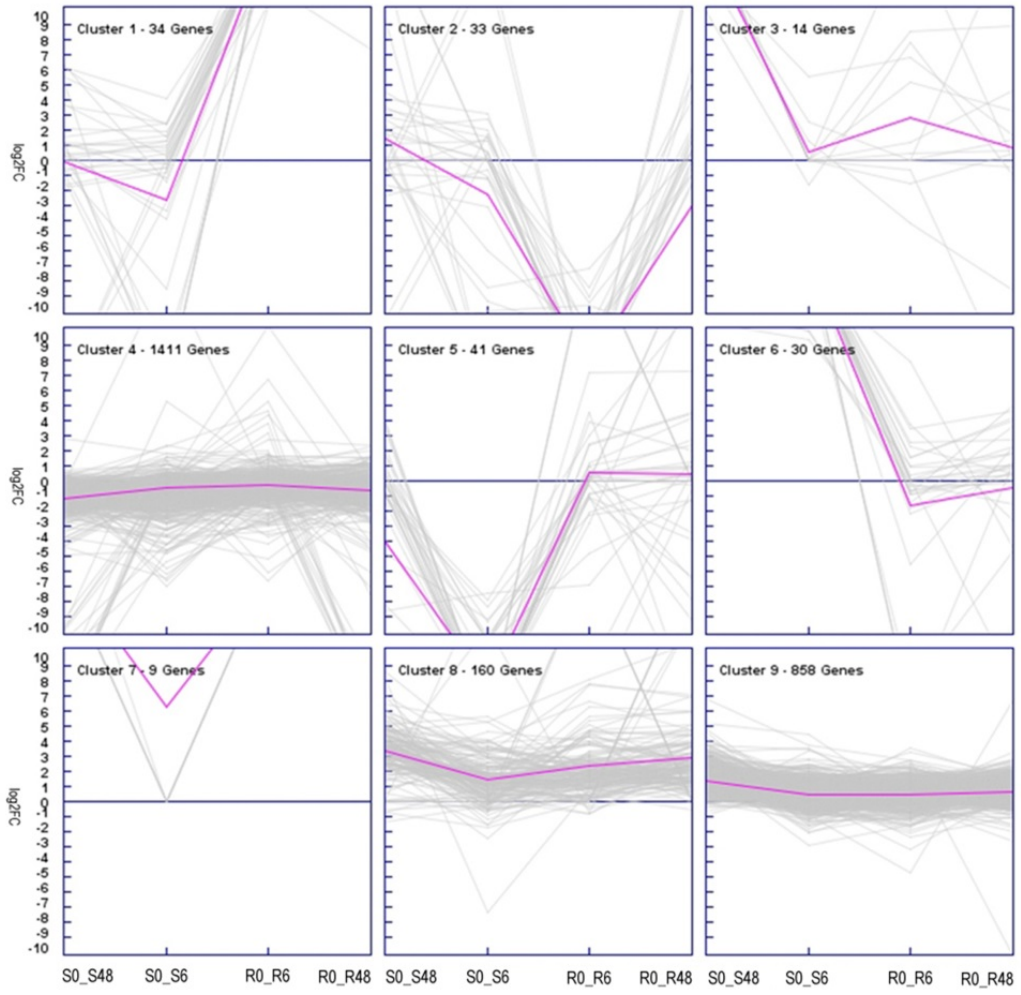**B**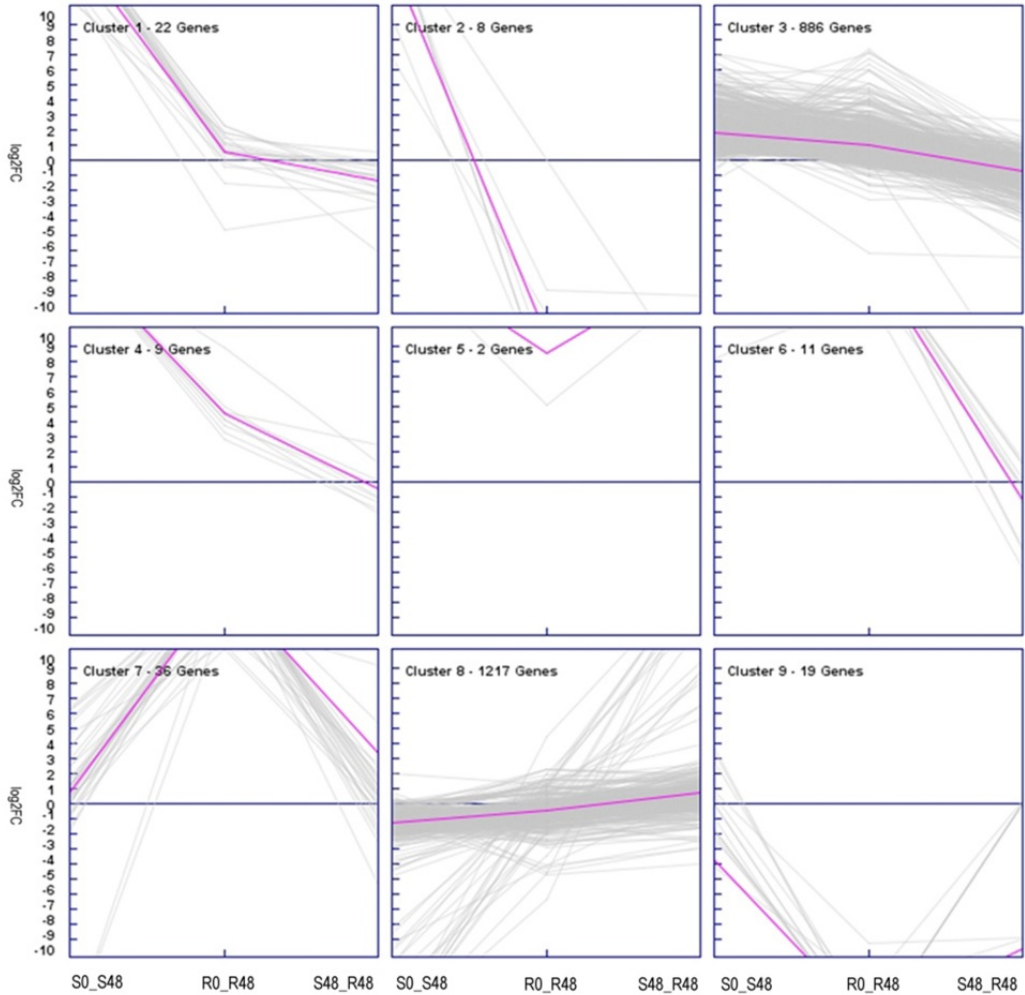

**Additional file 6** K-means clustering analysis of DEGs based on log ratio of FPKM data. A, DEGs of S and R. B, DEGs at 48 HAI. The pink lines indicate representative transcriptional regulators.
