# Supplementary material for: BAC and RNA sequencing reveal the brown planthopper resistance gene BPH15 in a recombination cold spot that mediates a unique defense mechanism
Source: PubMed Central journal article supplement (PMC4148935; doi:10.1186/1471-2164-15-674), 2014-08-11
Supplement: 12864_2014_6374_MOESM9_ESM.pdf [file 12864_2014_6374_MOESM9_ESM.pdf]

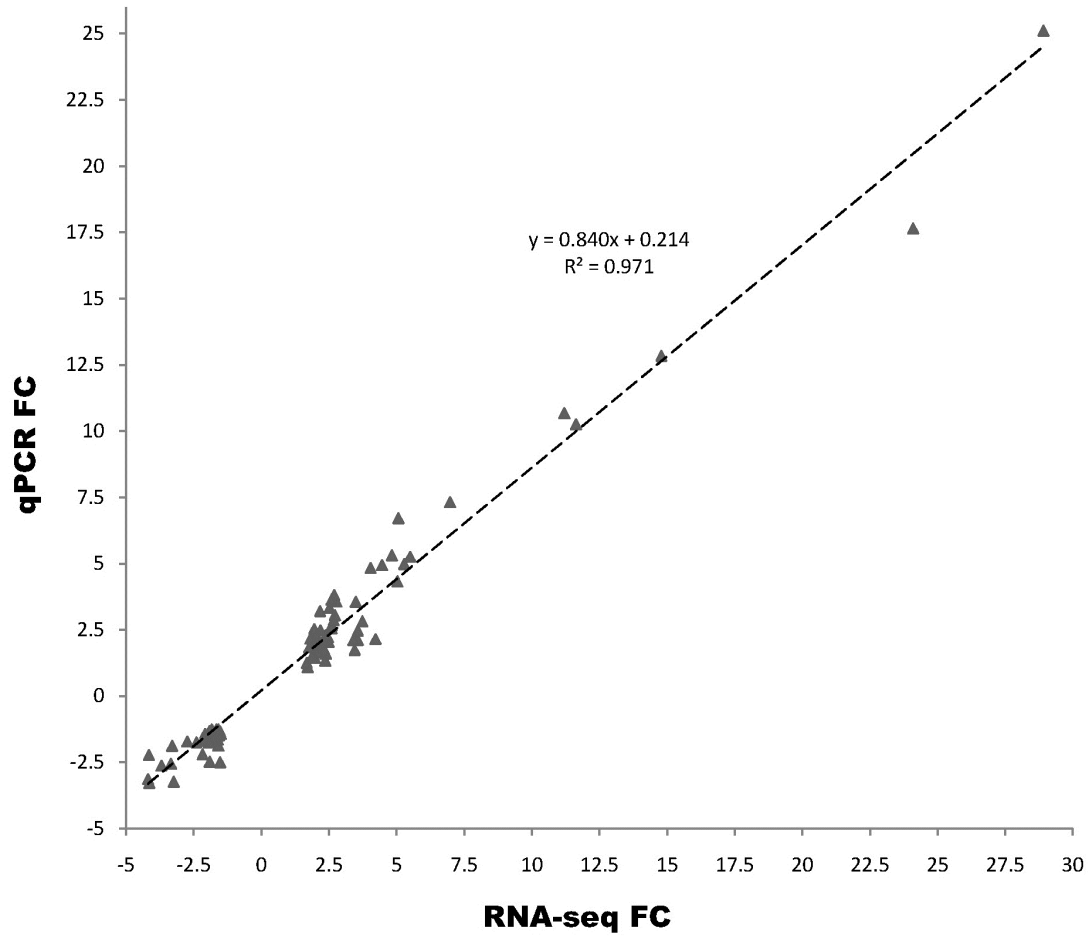

**Additional file 9** RNA-seq concordance with real-time qPCR results. The graph displays the concordance between RNA-seq and qPCR fold-change values on a linear scale.
