# Supplementary material for: BAC and RNA sequencing reveal the brown planthopper resistance gene BPH15 in a recombination cold spot that mediates a unique defense mechanism
Source: PubMed Central journal article supplement (PMC4148935; doi:10.1186/1471-2164-15-674), 2014-08-11
Supplement: 12864_2014_6374_MOESM10_ESM.pdf [file 12864_2014_6374_MOESM10_ESM.pdf]

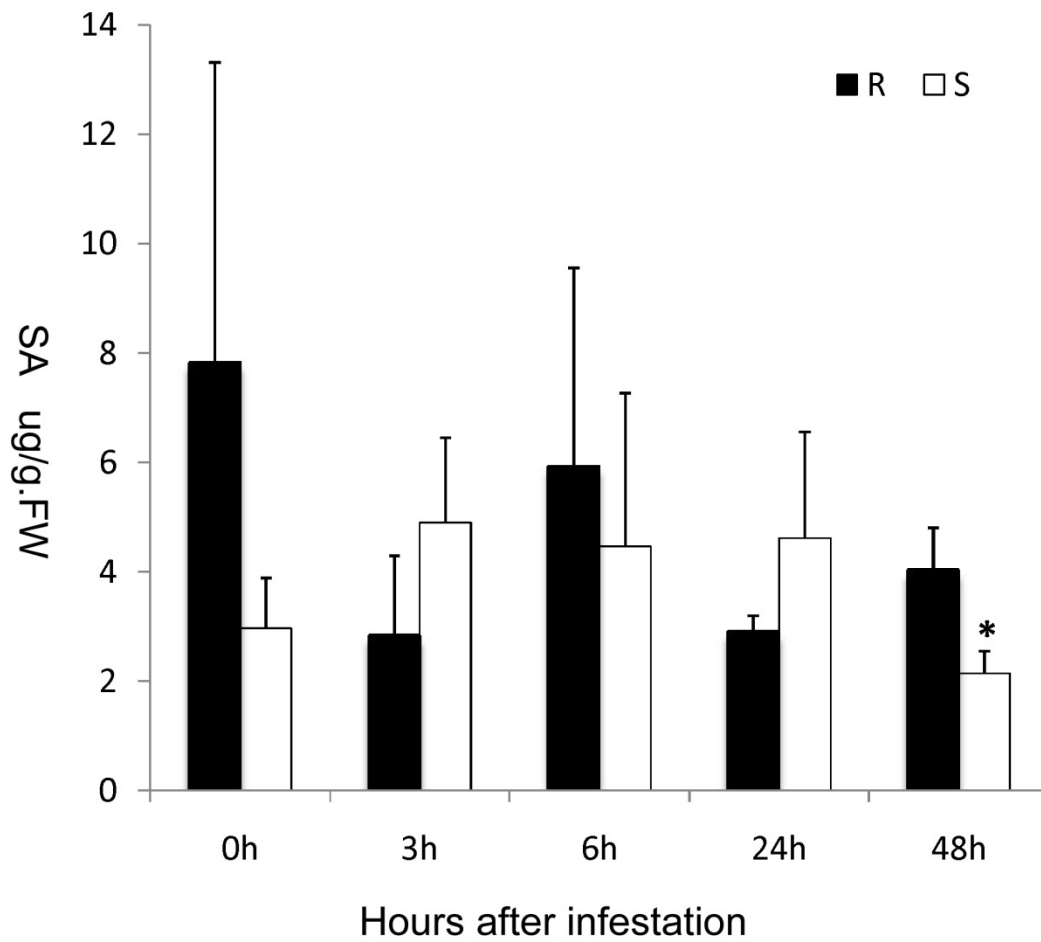

**Additional file 10** Measurement of salicylic acid content using gas chromatography-mass spectrometry. Error bars represent the SD,  $n = 3$ .
