# Supplementary material for: BAC and RNA sequencing reveal the brown planthopper resistance gene BPH15 in a recombination cold spot that mediates a unique defense mechanism
Source: PubMed Central journal article supplement (PMC4148935; doi:10.1186/1471-2164-15-674), 2014-08-11
Supplement: 12864_2014_6374_MOESM12_ESM.pdf [file 12864_2014_6374_MOESM12_ESM.pdf]

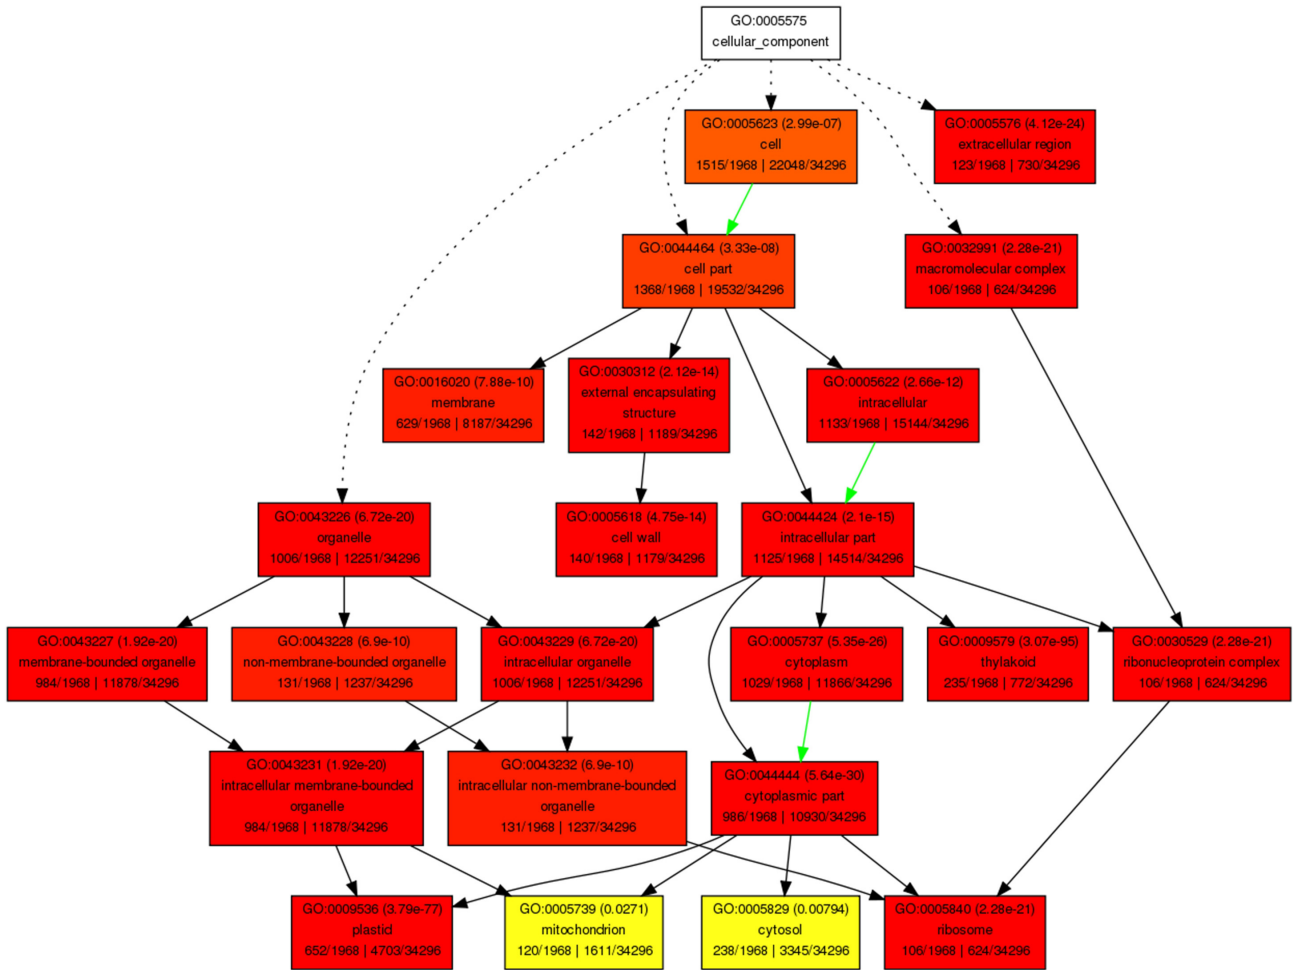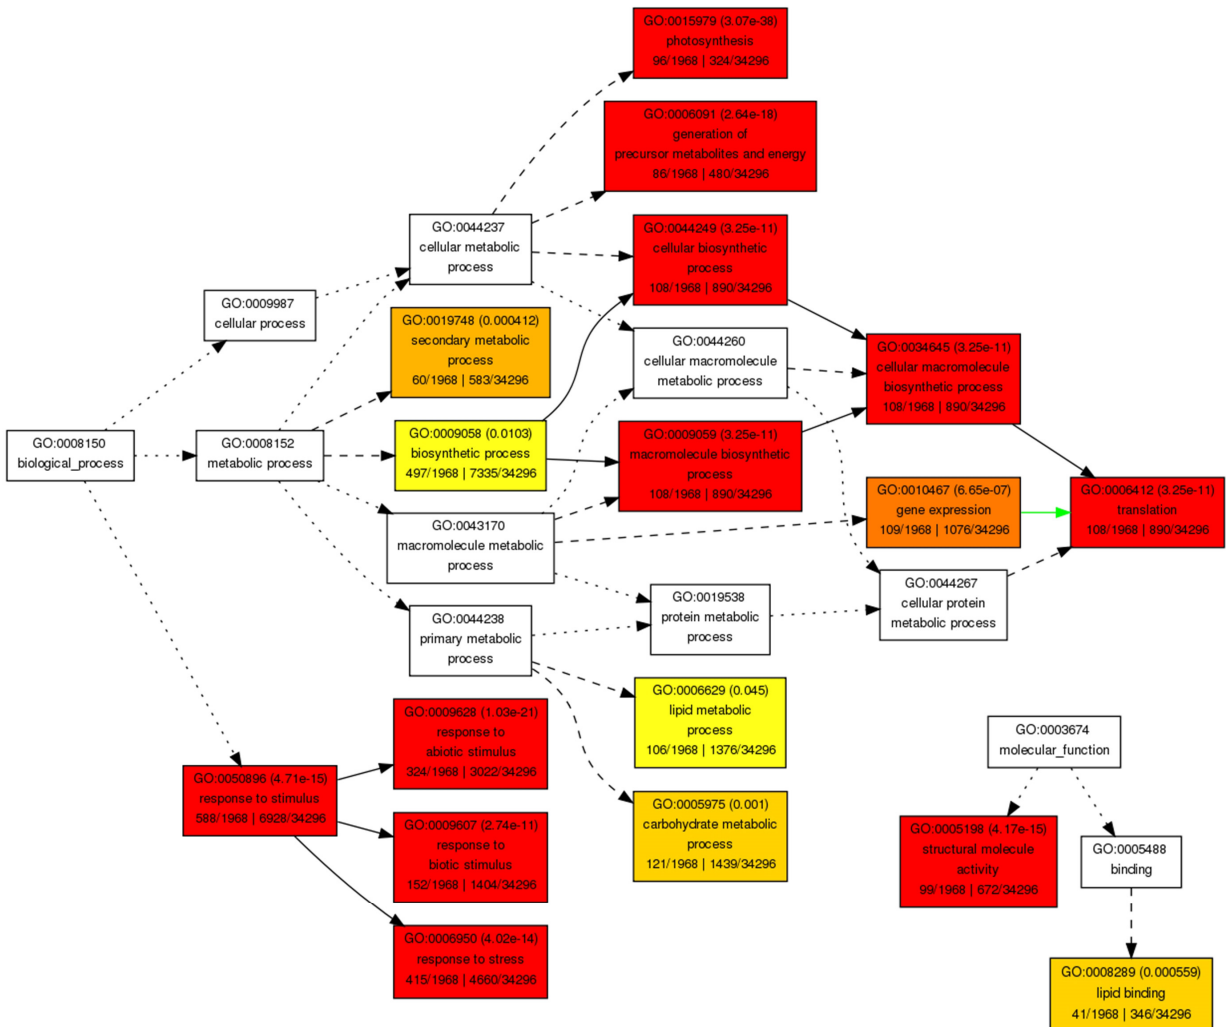

**Additional file 12** Graphical result of significant GO terms of S-all. The nodes in the image are classified into 10 levels, which are associated with corresponding specific colors. A smaller adjusted *P*-value indicates greater statistical significance, and the node's color is darker and redder. Information inside the box of the significant terms includes GO term, adjusted *P*-value, GO description, item number mapping the GO in the query list and background, and total number of query lists and background.
